# Supplementary material for: Zebrafish Xenograft Model for Studying Pancreatic Cancer-Instructed Innate Immune Microenvironment
Source: MDPI journal article supplement (doi:10.3390/ijms23126442), 2022-06-09
Supplement: s1 [file s1]

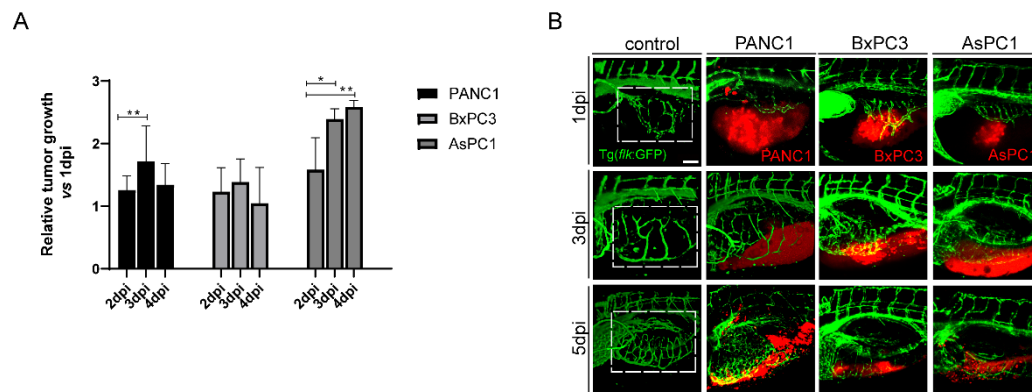

**Figure S1.** The daily growth and angiogenesis of PANC1, BxPC3, AsPC1 cells in zebrafish xenografts. (A) Relative tumor growth for PANC1, BxPC3, AsPC1 xenografts at 2-4 dpi vs 1dpi. Results are shown as means  $\pm$  SEM from 9 different individuals (\* $p$  < 0.05, \*\* $p$  < 0.01, t test). (B) Representative confocal images of the sub-intestinal vessels in PANC1, BxPC1, AsPC1 xenografts at 4 dpi in Tg(flk:GFP) background. The white boxes in the left column mark the sub-intestinal vessels and are magnified in the right three columns. dpi, days post injection. Scale bar, 50  $\mu$ m.

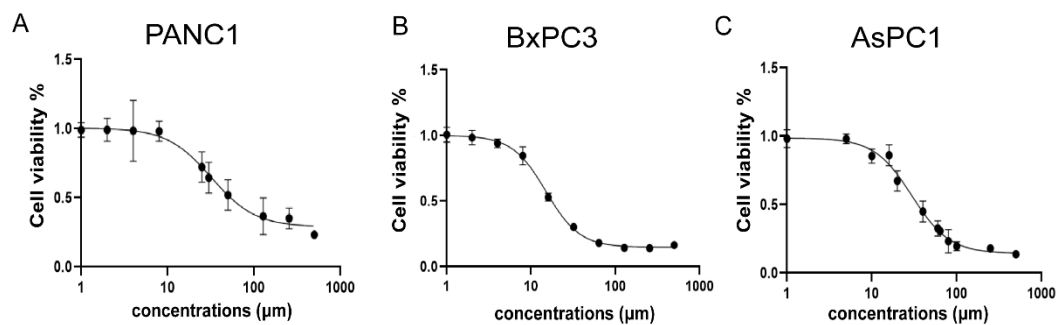

**Figure S2.** Dose-effect curve of irinotecan in PANC1, BxPC3, AsPC1 cultured cells.

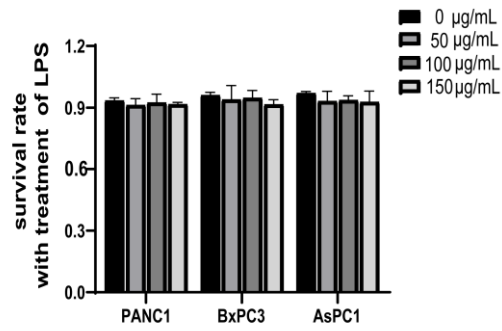

**Figure S3.** The survival rate of *in vitro* cultured PANC, BxPC3, AsPC1 cells after the treatment of LPS at different concentrations.

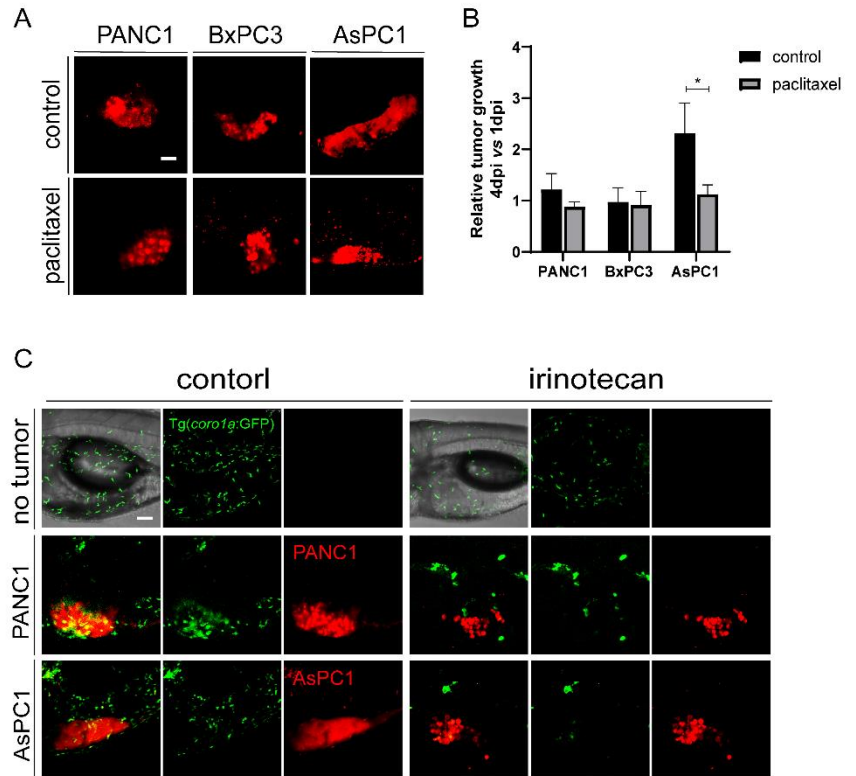

**Figure S4.** The effects of paclitaxel and irinotecan to pancreatic cancer progression. (A) Representative confocal images of PANC1, BxPC3, AsPC1 xenografts at 4 dpi after the treatment of DMSO (control) or paclitaxel (40 µM) respectively. (B) Relative tumor growth in xenografts after treated with DMSO or paclitaxel. Results are shown as means  $\pm$  SEM from 9 different individuals (\* $p$  < 0.05,  $t$  test). (C) Representative confocal images of PANC1, AsPC1 xenografts in Tg(cor01a:GFP) at 4dpi after the treatment of DMSO (control) or irinotecan (50 µM). dpi, days post injection. Scale bars in A and C, 50 µm.
